# Supplementary material
Source: Springer Nature journal article supplement (https://www.springermedizin.de/resource/supplementary/13075_2009_2810_MOESM2_ESM.pdf/9692940)

**(a)**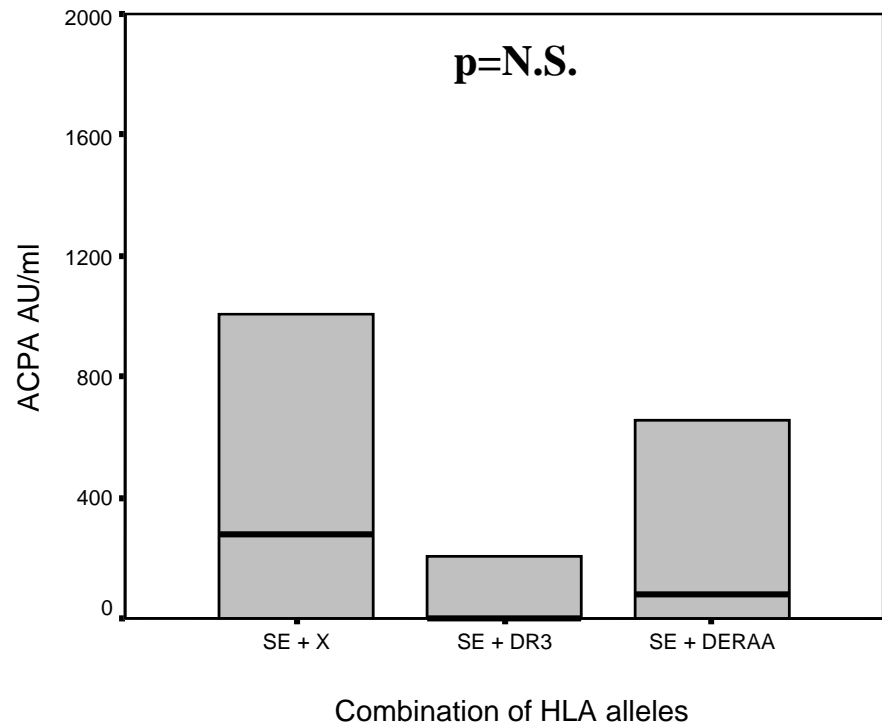**(b)**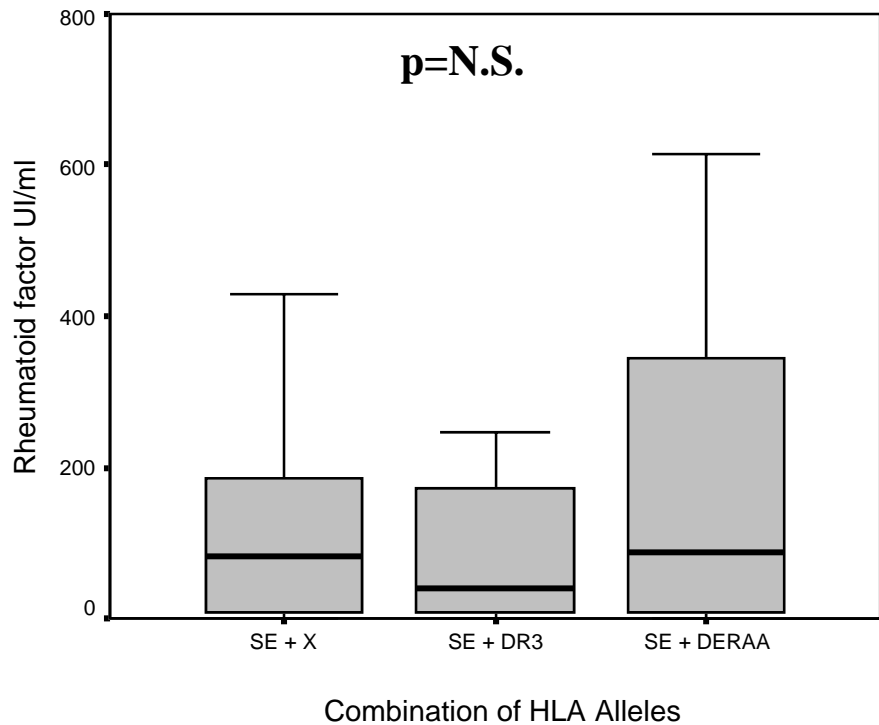

Supplement: MOESM2 [file 9692940]
